# Supplementary material
Source: publisher site journal article supplement (https://www.degruyterbrill.com/publication/isbn/9783110895391/downloadAsset/9783110895391_Inhaltsverzeichnis.pdf)
Supplement: Supplementary file 1 [file 9783110895391_Inhaltsverzeichnis.pdf]

## Inhaltsübersicht

|                                               |      |
|-----------------------------------------------|------|
| Verzeichnis späterer Normänderungen . . . . . | IV   |
| Abkürzungsverzeichnis . . . . .               | XXIX |

### AKTIENGESETZ

#### ERSTES BUCH

#### AKTIENGESELLSCHAFT

##### Fünfter Teil

##### Rechnungslegung. Gewinnverwendung

|                          |                                                                       |            |
|--------------------------|-----------------------------------------------------------------------|------------|
| <i>Erster Abschnitt</i>  | Jahresabschluss und Lagebericht. Entsprechens-<br>erklärung . . . . . | §§ 150–161 |
| <i>Zweiter Abschnitt</i> | Prüfung des Jahresabschlusses . . . . .                               | §§ 162–171 |
| 1. Unterabschnitt        | Prüfung durch den Abschlußprüfer . . . . .                            | §§ 162–169 |
| 2. Unterabschnitt        | Prüfung durch den Aufsichtsrat . . . . .                              | §§ 170–171 |
| <i>Dritter Abschnitt</i> | Feststellung des Jahresabschlusses. Gewinnverwen-<br>dung . . . . .   | §§ 172–176 |
| 1. Unterabschnitt        | Feststellung des Jahresabschlusses . . . . .                          | §§ 172–173 |
| 2. Unterabschnitt        | Gewinnverwendung . . . . .                                            | § 174      |
| 3. Unterabschnitt        | Ordentliche Hauptversammlung . . . . .                                | §§ 175–176 |
| <i>Vierter Abschnitt</i> | Bekanntmachung des Jahresabschlusses . . . . .                        | §§ 177–178 |

##### Sechster Teil

##### Satzungsänderung. Maßnahmen der Kapitalbeschaffung und Kapitalherabsetzung

|                          |                                                    |            |
|--------------------------|----------------------------------------------------|------------|
| <i>Erster Abschnitt</i>  | Satzungsänderung . . . . .                         | §§ 179–181 |
| <i>Zweiter Abschnitt</i> | Maßnahmen der Kapitalbeschaffung . . . . .         | §§ 182–221 |
| 1. Unterabschnitt        | Kapitalerhöhung gegen Einlagen . . . . .           | §§ 182–191 |
| 2. Unterabschnitt        | Bedingte Kapitalerhöhung . . . . .                 | §§ 192–201 |
| 3. Unterabschnitt        | Genehmigtes Kapital . . . . .                      | §§ 202–206 |
| 4. Unterabschnitt        | Kapitalerhöhung aus Gesellschaftsmitteln . . . . . | §§ 207–220 |

Sachregister
